# Supplementary material for: Antimicrobial Peptide Omiganan Enhances Interferon Responses to Endosomal Toll‐Like Receptor Ligands in Human Peripheral Blood Mononuclear Cells
Source: PubMed Central journal article supplement — Clin Transl Sci. 2020 Apr 21;13(5):891–5. doi: 10.1111/cts.12789 (PMC7485948; doi:10.1111/cts.12789), 2020-04-21
Supplement: CTS-13-891-s001.pdf [file CTS-13-891-s001.pdf]

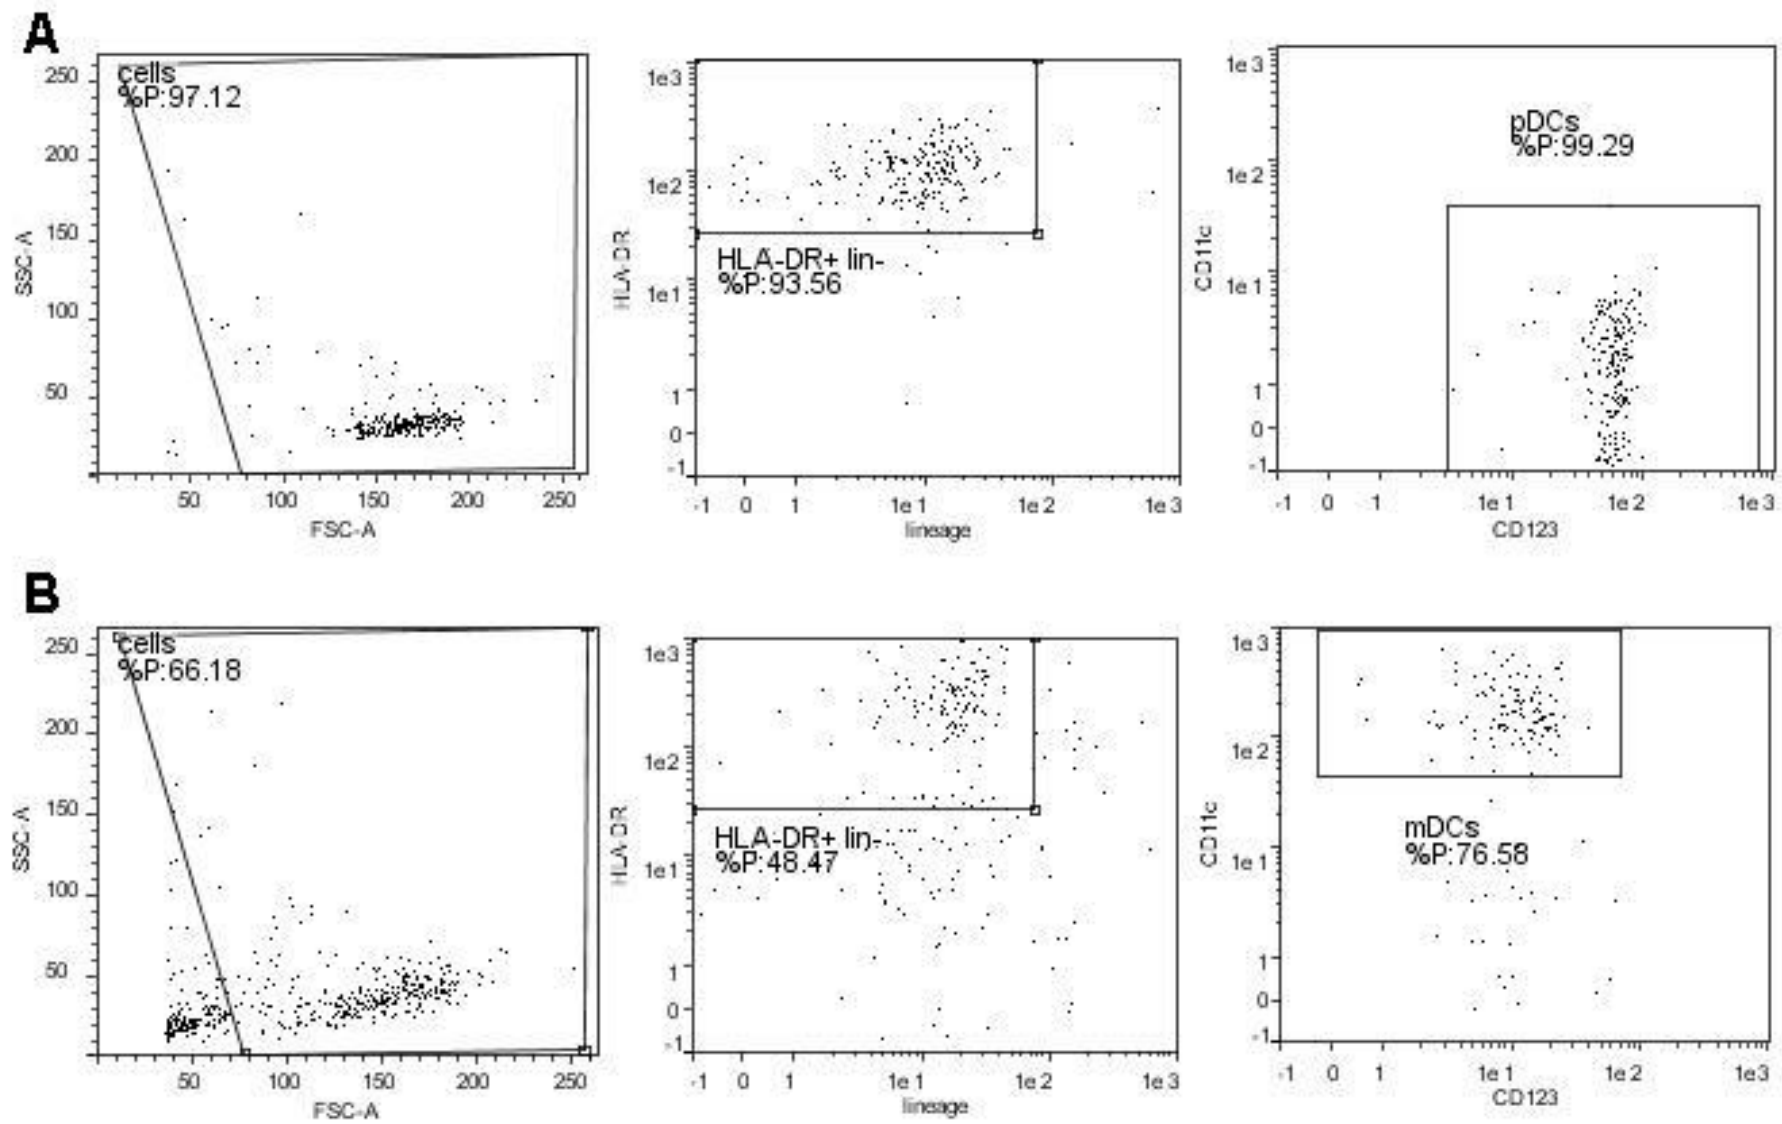

Figure S1. Gating strategy for purity assessment of isolated DCs. pDCs (panel A) are characterized as  $lin^{-}$ , HLA-DR $^{+}$ , CD11c $^{-}$  and CD123 $^{+}$ . mDCs (panel B) are characterized as  $lin^{-}$ , HLA-DR $^{+}$ , CD11c $^{+}$  and CD123 $^{-}$ .
