# Supplementary material for: Antimicrobial Peptide Omiganan Enhances Interferon Responses to Endosomal Toll‐Like Receptor Ligands in Human Peripheral Blood Mononuclear Cells
Source: PubMed Central journal article supplement — Clin Transl Sci. 2020 Apr 21;13(5):891–5. doi: 10.1111/cts.12789 (PMC7485948; doi:10.1111/cts.12789), 2020-04-21
Supplement: CTS-13-891-s002.pdf [file CTS-13-891-s002.pdf]

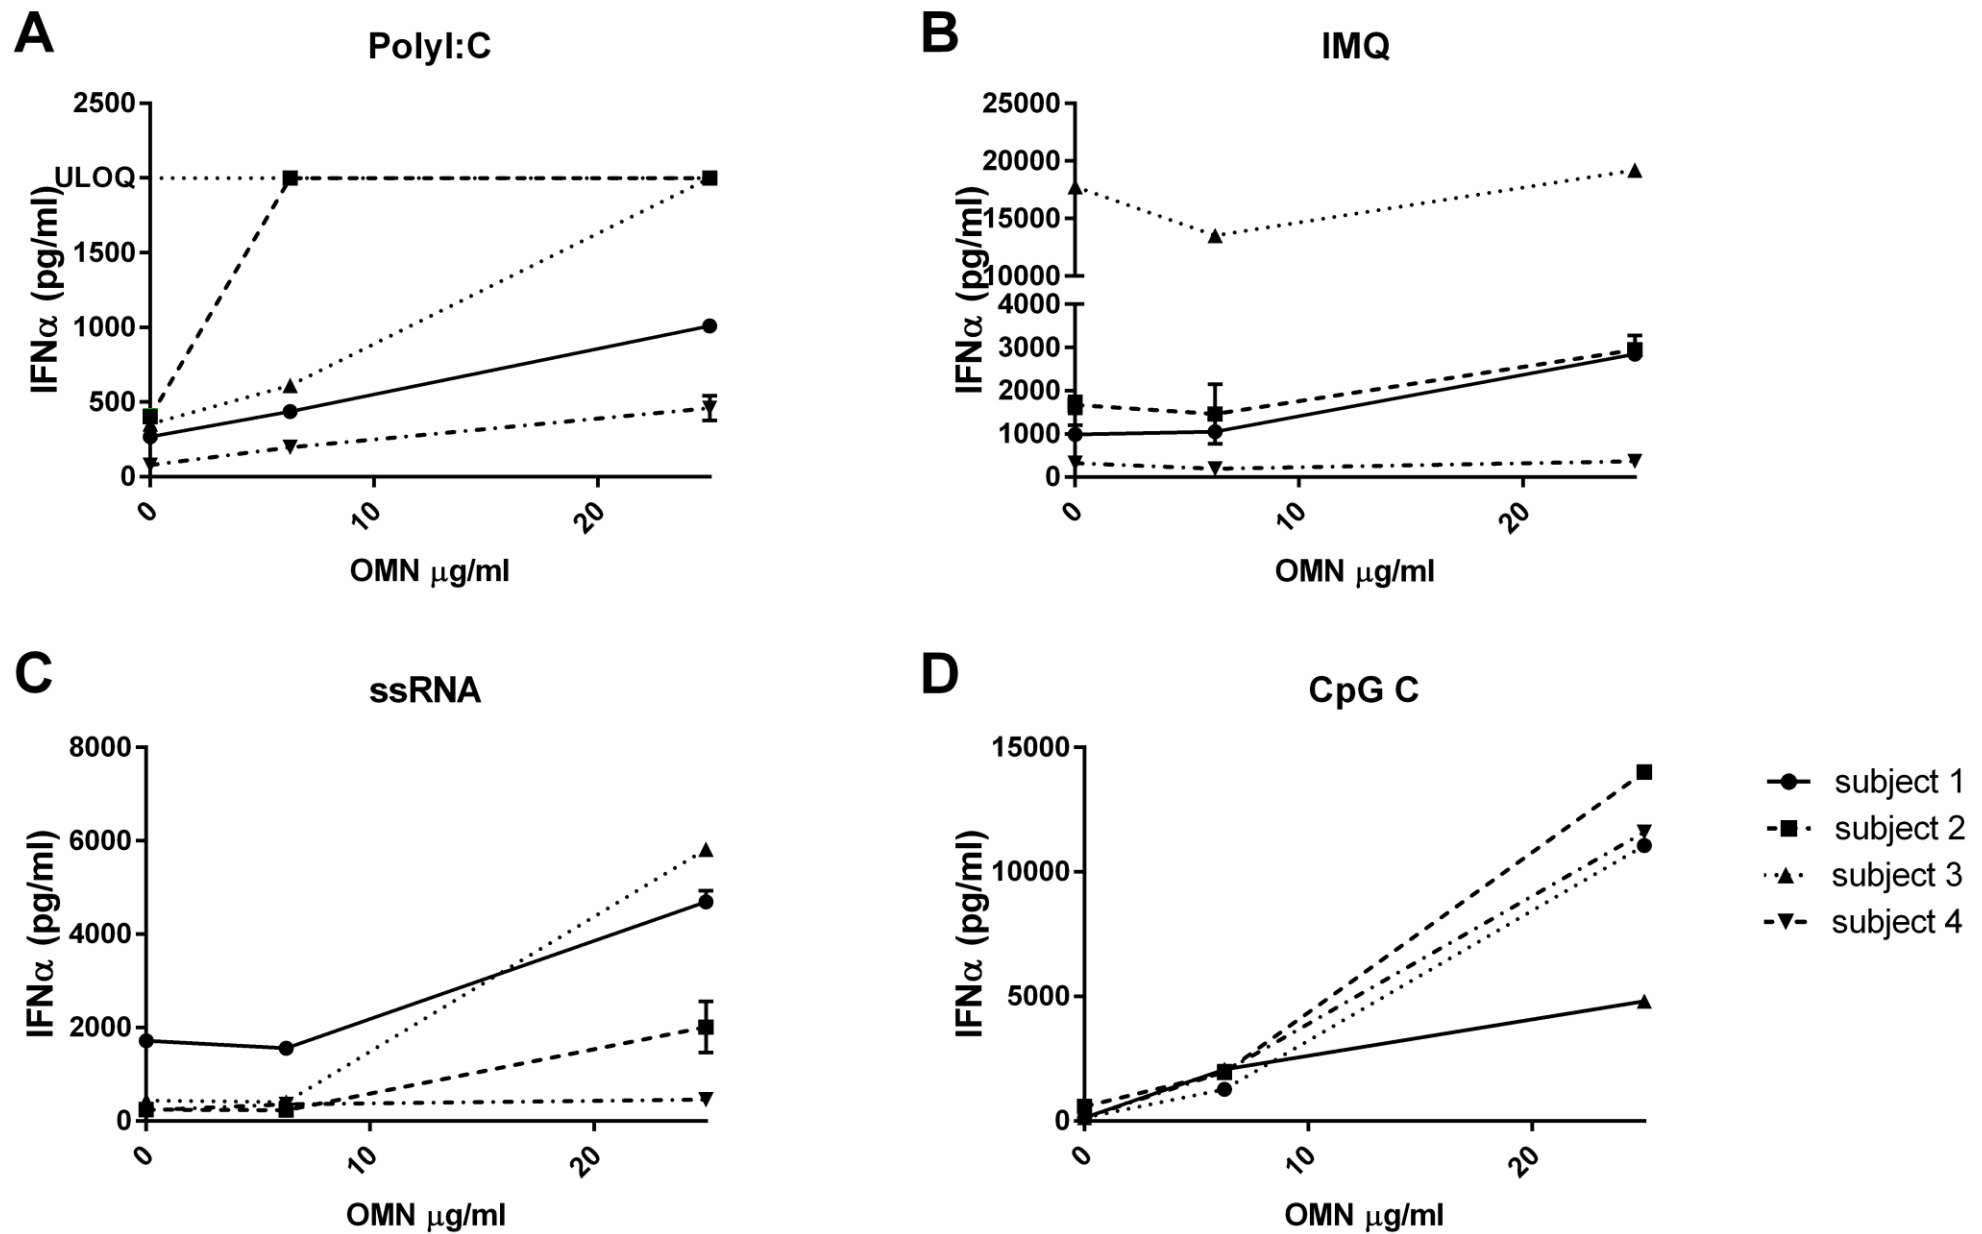

Figure S2. PBMCs from 4 subjects were treated with either 0, 6.25 or 25  $\mu$ g/mL omiganan for 30 minutes prior to stimulation with 50  $\mu$ g/mL polyI:C (panel A), 1  $\mu$ g/ml imiquimod (panel B), 2.5  $\mu$ g/mL ssRNA40/lyovec (panel C) or 2.5  $\mu$ M CpG class C (panel D) for 24 hours. IFN $\alpha$  was quantified in cell supernatant (individual data, mean of duplicate culture + SD).
